# Supplementary material
Source: Springer Nature journal article supplement (https://www.springermedizin.de/resource/supplementary/12879_2009_1036_MOESM1_ESM.pdf/9442436)

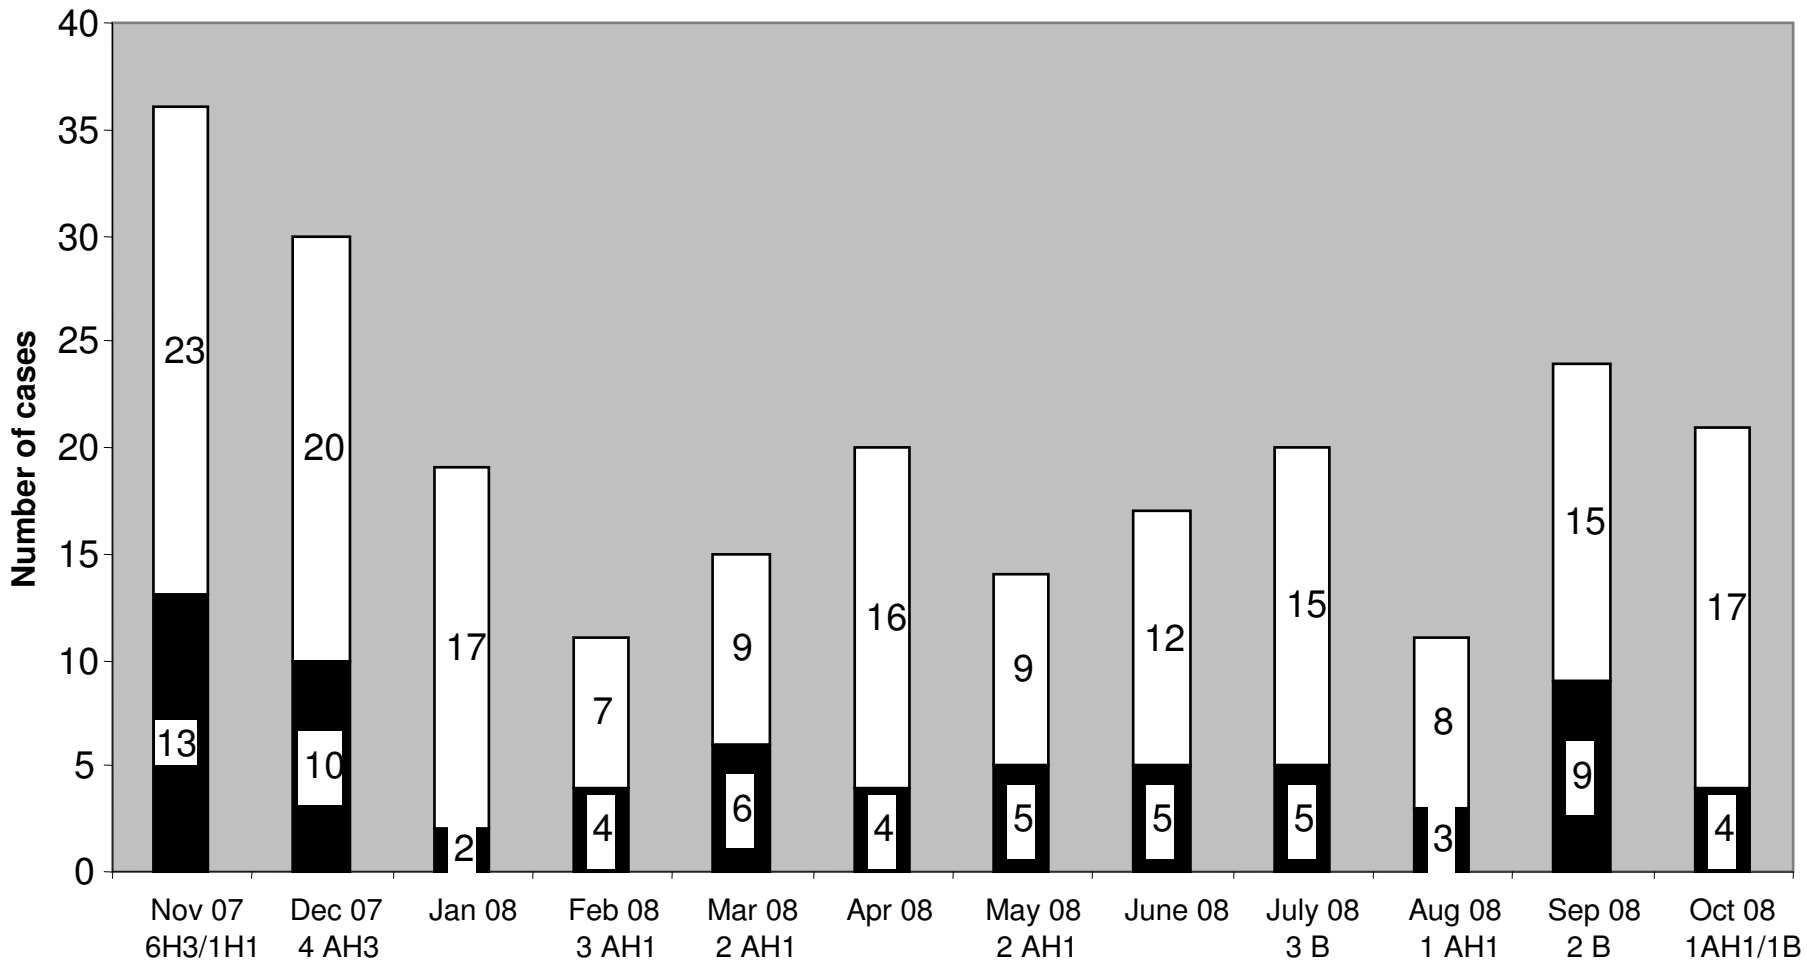

**Flunet Epidemiological Month**

Positive
  Negative

Supplement: MOESM1 [file 9442436]
